# Supplementary material for: Prevalence of Intestinal Neurogenic Bowel and Lower Urinary Tract Dysfunctions in Brazilians with Traumatic and Non-Traumatic Spinal Cord Injury
Source: Research Square preprint supplement (doi:10.21203/rs.3.rs-5046196/v1), 2024-10-24
Supplement: Supplementary file 1 [file e11e6064297e5b4f8b77ee9e.xlsx]

## Sheet: Página1
	Table 2 - Distribution of participants according to the cause of SCI, gender, current age, age at the time of injury, and time of injury, in years (n= 1056), Brazil, 2023.
		Sex		Current age		Age at which the injury occurred		Injury time
		Male	Female	Median	Q1-Q3	Median	Q1-Q3	Median	Q1-Q3
	TSCI	521 (71.47%)	122 (37.31%)	40	32-51	28	21-39	9	5-16
	NTSCI	208 (28.53%)	205 (62.69%)	54*	43-64	41	28-54	10	6-21
	Total	729 (100%)	327 (100%)	42	32-55	29	19-43	11	6-20
	TSCI: traumatic spinal cord injury
	NTSCI: non-traumatic spinal cord injury
	*NTSCI ages do not include congenital lesion data
	Source: Prepared by the authors, 2024.
